# Supplementary material for: Deep Sequencing of the Transcriptome Reveals Inflammatory Features of Porcine Visceral Adipose Tissue
Source: PubMed Central journal article supplement — Int J Biol Sci. 2013 Jun 9;9(6):550–6. doi: 10.7150/ijbs.6257 (PMC3683940; doi:10.7150/ijbs.6257), 2013-06-09
Supplement: ijbsv09p0550s1.pdf [file ijbsv09p0550s1.pdf]

**Table S1. Difference in fatty acid composition of HLB, GOM and MAD**

| Fatty acid (g·100g <sup>-1</sup> ) | HLB          | GOM          | MAD          | <i>P</i> <sup>a</sup> | <i>P</i> -Value <sup>b</sup> |                       |                       |
|------------------------------------|--------------|--------------|--------------|-----------------------|------------------------------|-----------------------|-----------------------|
|                                    |              |              |              |                       | <i>P</i> <sub>1</sub>        | <i>P</i> <sub>2</sub> | <i>P</i> <sub>3</sub> |
| C10:0 (decanoic)                   | 0.037±0.004  | 0.065±0.004  | 0.556±0.006  | 0.001                 | 0.001                        | 0.008                 | 0.162                 |
| C12:0 (lauric)                     | 0.048±0.002  | 0.082±0.004  | 0.077±0.001  | <0.001                | <0.001                       | <0.001                | 0.152                 |
| C14:0 (myristic)                   | 0.997±0.036  | 1.469±0.037  | 1.357±0.022  | <0.001                | <0.001                       | <0.001                | 0.013                 |
| C16:0 (palmitic)                   | 22.31±0.801  | 27.675±0.089 | 27.766±0.684 | <0.001                | <0.001                       | <0.001                | 0.990                 |
| C17:0 (margaric)                   | 0.359±0.034  | 0.333±0.064  | 0.292±0.022  | 0.247                 | -                            | -                     | -                     |
| C18:0 (stearic)                    | 13.303±1.472 | 19.603±0.614 | 21.316±1.238 | <0.001                | 0.002                        | <0.001                | 0.248                 |
| C20:0 (arachidic)                  | 0.339±0.036  | 0.352±0.02   | 0.337±0.029  | 0.799                 | -                            | -                     | -                     |
| SFA                                | 37.393±2.193 | 49.578±1.485 | 51.2±1.956   | <0.001                | <0.001                       | <0.001                | 0.578                 |
| C16:1n-7 (palmitoleic)             | 1.742±0.147  | 1.46±0.077   | 1.347±0.169  | 0.03                  | 0.098                        | 0.028                 | 0.598                 |
| C17:1n-10 (ginkgolic)              | 0.225±0.013  | 0.147±0.014  | 0.133±0.006  | <0.001                | <0.001                       | <0.001                | 0.369                 |
| C18:1n-9 (oleic)                   | 41.378±1.32  | 34.874±0.492 | 35.888±0.493 | <0.001                | <0.001                       | <0.001                | 0.380                 |
| C20:1n-9 (eicosenoic)              | 0.150±0.003  | 0.126±0.007  | 0.158±0.004  | 0.015                 | 0.048                        | 0.608                 | 0.015                 |
| C22:1n-9 (erucic)                  | 0.015±0.003  | 0.013±0.002  | 0.013±0.001  | 0.388                 | -                            | -                     | -                     |
| MUFA                               | 43.54±1.268  | 36.619±0.491 | 37.54±0.661  | <0.001                | <0.001                       | <0.001                | 0.450                 |
| C18:2n-6 (linoleic)                | 16.036±0.77  | 11.563±0.85  | 9.325±2.017  | 0.011                 | <0.05                        | <0.05                 | ns <sup>c</sup>       |
| C18:3n-3 (α-linolenic)             | 0.760±0.011  | 0.570±0.031  | 0.460±0.078  | <0.001                | 0.008                        | <0.001                | 0.071                 |
| C18:3n-6 (γ-linolenic)             | 0.019±0.001  | 0.036±0.002  | 0.029±0.004  | <0.001                | <0.001                       | 0.008                 | 0.053                 |
| C20:2n-6 (eicosadienoic)           | 0.081±0.051  | 0.461±0.044  | 0.401±0.058  | <0.001                | <0.001                       | <0.001                | 0.389                 |
| C20:3n-3 (eicosatrienoic)          | 1.368±0.137  | 1.11±0.095   | 0.999±0.197  | 0.056                 | -                            | -                     | -                     |
| C20:5n-3 (EPA)                     | 0.017±0.001  | 0.015±0.002  | 0.013±0.000  | 0.023                 | 0.248                        | 0.019                 | 0.175                 |
| C22:6n-3 (DHA)                     | 0.055±0.005  | 0.049±0.009  | 0.043±0.004  | 0.180                 | -                            | -                     | -                     |
| PUFA                               | 19.067±0.954 | 13.803±1.006 | 11.26±2.34   | 0.002                 | 0.015                        | 0.002                 | 0.197                 |
| PUFA/SFA                           | 0.510        | 0.278        | 0.220        | <0.001                | 0.003                        | <0.001                | 0.362                 |
| Palmitoleic/Palmitic <sup>d</sup>  | 0.078        | 0.053        | 0.049        | 0.001                 | 0.004                        | 0.002                 | 0.640                 |
| Oleic/Stearic <sup>d</sup>         | 3.111        | 1.779        | 1.684        | 0.025                 | <0.05                        | <0.05                 | ns <sup>c</sup>       |
| Stearic/Palmitic <sup>e</sup>      | 0.596        | 0.708        | 0.768        | 0.002                 | 0.014                        | 0.002                 | 0.156                 |

Note: In total of 19 different hydrocarbon chain length (from 10-22 carbons) fatty acid were classified into three main types, i.e. the saturated (SFA), monounsaturated (MUFA) and polyunsaturated fatty acid (PUFA).

Data normally distributed (Kolmogorov-Smirnov test,  $P > 0.05$ ). The statistical significance were calculated by One-Way ANOVA, Tukey multiple range test ( $n = 3$ ). Values are means ± s.d. The significance level is set at 0.05.

<sup>a</sup> One-Way ANOVA test *P* value;

<sup>b</sup> Multiple Comparison *P*-value, *P*<sub>1</sub>: HLB vs GOM; *P*<sub>2</sub>: HLB vs MAD; *P*<sub>3</sub>: GOM vs MAD;

<sup>c</sup> Data not normally distributed, Student-Newman-Keuls rank test was used, ns: not significance;

<sup>d</sup> Desaturation index;

<sup>e</sup> Elongation index.

**Table S2 - Differentially expressed genes between SAT and VAT**

| Ensembl Transcript ID | Gene symbol         | Expression level (FPKM) |         |         | P-value              |                      |                      |
|-----------------------|---------------------|-------------------------|---------|---------|----------------------|----------------------|----------------------|
|                       |                     | HLB                     | GOM     | MAD     | $P_{\text{HLB-GOM}}$ | $P_{\text{HLB-MAD}}$ | $P_{\text{GOM-MAD}}$ |
| ENSSSCT00000000030    | <i>SCUBE1</i>       | 1.66056                 | 16.2145 | 18.0509 | 1.01611E-06          | 9.67542E-07          | 0.69002              |
| ENSSSCT00000000031    | -                   | 0.664532                | 25.7123 | 23.546  | 1.36529E-07          | 1.82482E-07          | 0.751263             |
| ENSSSCT00000000111    | <i>KDELR3</i>       | 34.6235                 | 9.78001 | 8.57146 | 3.73536E-05          | 0.000128003          | 0.697598             |
| ENSSSCT00000000253    | <i>LOC100522015</i> | 4.54781                 | 20.9664 | 26.6302 | 7.08807E-05          | 2.17599E-05          | 0.369646             |
| ENSSSCT00000000415    | -                   | 1.48302                 | 12.7844 | 14.1784 | 4.29831E-05          | 2.65587E-05          | 0.734627             |
| ENSSSCT00000000453    | <i>LOC100512656</i> | 100.688                 | 257.946 | 247.467 | 2.11046E-05          | 0.00175953           | 0.839173             |
| ENSSSCT00000000466    | -                   | 28.8327                 | 120.955 | 90.6496 | 9.60385E-07          | 0.00111135           | 0.216165             |
| ENSSSCT00000000653    | <i>ART4</i>         | 6.8901                  | 21.2499 | 25.0029 | 0.00172806           | 0.00116633           | 0.5523               |
| ENSSSCT00000000721    | <i>RIMKLB</i>       | 10.5302                 | 35.0587 | 33.8067 | 2.46281E-05          | 0.000640076          | 0.874476             |
| ENSSSCT00000000823    | <i>LOC100516268</i> | 5.87947                 | 56.0779 | 84.3954 | 3.71714E-11          | 2.24243E-12          | 0.062653             |
| ENSSSCT00000000860    | -                   | 5.28353                 | 17.5883 | 20.088  | 6.78304E-05          | 0.000148809          | 0.573854             |
| ENSSSCT00000000861    | <i>ADAMTS20</i>     | 0.303892                | 5.38679 | 4.60712 | 0.000015395          | 0.000156296          | 0.606927             |
| ENSSSCT00000000865    | <i>LOC100523377</i> | 31.1369                 | 6.86799 | 10.0046 | 0.000009887          | 0.00198078           | 0.303744             |
| ENSSSCT00000000873    | <i>ANO6</i>         | 21.0425                 | 5.01877 | 4.3158  | 1.24728E-05          | 0.000042193          | 0.689801             |
| ENSSSCT00000001110    | <i>F13A1</i>        | 50.0104                 | 21.4185 | 16.2496 | 0.000306463          | 0.000210751          | 0.235955             |
| ENSSSCT00000001118    | <i>LOC100156744</i> | 0.634654                | 3.70061 | 3.53659 | 5.27873E-06          | 5.20432E-05          | 0.864011             |
| ENSSSCT00000001170    | <i>DEK</i>          | 73.5159                 | 27.2339 | 24.557  | 2.30973E-05          | 0.000274782          | 0.655782             |
| ENSSSCT00000001559    | <i>EHMT2</i>        | 10.5121                 | 22.2643 | 31.4123 | 0.0016844            | 0.000331469          | 0.101591             |
| ENSSSCT00000001578    | -                   | 0.595747                | 4.88688 | 7.9333  | 0.00203925           | 9.36943E-05          | 0.202157             |
| ENSSSCT00000001634    | <i>SLA-DMA</i>      | 18.0229                 | 51.3643 | 71.4711 | 0.000273189          | 4.47574E-05          | 0.149476             |
| ENSSSCT00000001649    | <i>BMP5</i>         | 20.3223                 | 2.87315 | 1.19554 | 9.58783E-07          | 9.22043E-08          | 0.135687             |
| ENSSSCT00000001659    | <i>KLHL31</i>       | 1.53225                 | 23.766  | 22.2229 | 2.2582E-10           | 6.31087E-09          | 0.778875             |
| ENSSSCT00000002068    | -                   | 10.4364                 | 47.4677 | 48.8688 | 1.83811E-06          | 0.000024169          | 0.902281             |
| ENSSSCT00000002139    | <i>ISLR</i>         | 44.9009                 | 97.2282 | 178.336 | 0.00105166           | 3.59986E-06          | 0.00345              |
| ENSSSCT00000002535    | <i>SPTB</i>         | 0.077862                | 0.88632 | 0.79334 | 0.00101509           | 0.00140178           | 0.789522             |
| ENSSSCT00000002650    | <i>FOS</i>          | 121.974                 | 574.317 | 525.28  | 9.80571E-12          | 5.39935E-07          | 0.681179             |
| ENSSSCT00000003101    | <i>NDRG4</i>        | 11.0111                 | 45.1962 | 52.5465 | 1.85875E-06          | 6.78263E-06          | 0.507131             |
| ENSSSCT00000003324    | -                   | 119.203                 | 31.5494 | 37.6875 | 1.69267E-08          | 0.000121415          | 0.436396             |
| ENSSSCT00000003325    | <i>LOC100738359</i> | 57.7839                 | 8.27616 | 14.864  | 1.77822E-10          | 4.94419E-05          | 0.06693              |
| ENSSSCT00000003335    | -                   | 480.814                 | 80.0326 | 104.312 | 0.000857753          | 0.00247421           | 0.676125             |
| ENSSSCT00000003504    | <i>LOC100522679</i> | 53.2426                 | 191.608 | 220.354 | 1.94322E-08          | 1.33421E-06          | 0.496357             |
| ENSSSCT00000003505    | -                   | 12.5101                 | 51.2438 | 43.9544 | 6.33373E-07          | 0.000241906          | 0.497564             |
| ENSSSCT00000003749    | <i>THAP3</i>        | 52.1491                 | 250.674 | 258.85  | 0.000192033          | 0.000373699          | 0.913389             |
| ENSSSCT00000003818    | -                   | 128.539                 | 314.439 | 319.408 | 5.54269E-05          | 0.00180336           | 0.939347             |
| ENSSSCT00000003900    | -                   | 36.3124                 | 5.78134 | 9.3605  | 6.36209E-05          | 0.00209266           | 0.355071             |
| ENSSSCT00000003969    | <i>LOC100512418</i> | 0.734579                | 10.4062 | 16.1182 | 0.00238562           | 0.000233143          | 0.333041             |
| ENSSSCT00000004238    | -                   | 110.382                 | 405.088 | 495.96  | 5.3172E-09           | 2.13685E-07          | 0.328053             |
| ENSSSCT00000004287    | <i>LOC100518433</i> | 5.09375                 | 22.4609 | 23.1588 | 3.66811E-05          | 0.000152804          | 0.906618             |
| ENSSSCT00000004389    | <i>LOC100522878</i> | 0.062093                | 2.80441 | 2.15628 | 0.000417476          | 0.0012158            | 0.664733             |
| ENSSSCT00000004397    | <i>KCNQ4</i>        | 8.54151                 | 20.525  | 27.2992 | 0.00225545           | 0.00059248           | 0.223388             |
| ENSSSCT00000004479    | -                   | 815.883                 | 331.762 | 269.339 | 9.72972E-05          | 0.0001633            | 0.312958             |
| ENSSSCT00000004681    | <i>PKIB</i>         | 12.3564                 | 36.1    | 37.5871 | 0.000993926          | 0.00283801           | 0.875467             |
| ENSSSCT00000005137    | <i>COPS2</i>        | 60.3184                 | 24.6311 | 16.6278 | 0.000648629          | 0.000124106          | 0.159321             |
| ENSSSCT00000005254    | <i>DLL4</i>         | 6.30871                 | 25.8679 | 38.1767 | 6.292E-07            | 7.7244E-08           | 0.074874             |
| ENSSSCT00000005307    | <i>LOC100156280</i> | 0.538897                | 35.2661 | 32.0297 | 3.11174E-06          | 2.85292E-06          | 0.75942              |
| ENSSSCT00000005394    | <i>SERPINB8</i>     | 38.5905                 | 12.9768 | 10.0351 | 0.000302087          | 0.000234485          | 0.442101             |
| ENSSSCT00000005572    | <i>LGALS3</i>       | 249.381                 | 64.2606 | 74.7164 | 4.0865E-09           | 4.06736E-05          | 0.500065             |
| ENSSSCT00000005607    | <i>SIX1</i>         | 35.551                  | 4.93901 | 3.92381 | 1.68357E-06          | 2.46893E-06          | 0.663166             |
| ENSSSCT00000005709    | <i>CNTLN</i>        | 4.74629                 | 1.18599 | 0.54834 | 0.00115388           | 0.000195465          | 0.222821             |
| ENSSSCT00000005726    | <i>PTPRD</i>        | 0.068575                | 2.2472  | 1.16016 | 3.46064E-05          | 0.000855503          | 0.106744             |
| ENSSSCT00000005777    | <i>PGM5</i>         | 15.617                  | 39.7176 | 74.588  | 0.000749345          | 1.73833E-06          | 0.004693             |
| ENSSSCT00000005828    | <i>TLE1</i>         | 5.29465                 | 18.1779 | 29.2317 | 1.98767E-05          | 4.36133E-07          | 0.03382              |
| ENSSSCT00000005925    | <i>NOR-1</i>        | 0.15225                 | 4.43646 | 4.47565 | 1.34427E-06          | 3.62512E-07          | 0.974751             |
| ENSSSCT00000005974    | -                   | 159.703                 | 49.5569 | 52.7781 | 4.08278E-05          | 0.00109235           | 0.832232             |
| ENSSSCT00000006000    | <i>SVEP1</i>        | 19.4418                 | 39.0081 | 50.6485 | 0.00155073           | 0.000870388          | 0.206852             |
| ENSSSCT00000006020    | <i>SAL1</i>         | 22.8415                 | 0.27144 | 1.03559 | 6.8527E-07           | 1.07385E-06          | 0.190784             |

|                                        |          |         |         |             |             |          |
|----------------------------------------|----------|---------|---------|-------------|-------------|----------|
| ENSSSCT00000006061 -                   | 0.491077 | 6.84057 | 7.91098 | 0.000453812 | 0.000145568 | 0.704981 |
| ENSSSCT00000006198 <i>SLC25A25</i>     | 1.23753  | 12.4345 | 8.87978 | 7.8023E-06  | 0.000260297 | 0.277035 |
| ENSSSCT00000006734 <i>CA3</i>          | 415.002  | 1675.25 | 1394.62 | 8.36942E-09 | 5.51052E-05 | 0.431428 |
| ENSSSCT00000006769 <i>LY96</i>         | 52.8922  | 12.1602 | 13.5723 | 0.000070514 | 0.000725699 | 0.792557 |
| ENSSSCT00000006968 <i>LOC100157276</i> | 13.5682  | 63.4789 | 73.7322 | 2.52601E-10 | 3.31045E-08 | 0.46622  |
| ENSSSCT00000007026 <i>LOC100152827</i> | 3.03081  | 18.7174 | 15.3349 | 0.000156893 | 0.00143797  | 0.53684  |
| ENSSSCT00000007089 <i>CRABP2</i>       | 27.2033  | 1.16379 | 1.91951 | 1.58262E-07 | 6.26996E-07 | 0.497518 |
| ENSSSCT00000007206 <i>LOC100156358</i> | 642.239  | 45.8104 | 26.045  | 0           | 0           | 0.088849 |
| ENSSSCT00000007358 <i>PHGDH</i>        | 76.3192  | 20.0056 | 27.6773 | 3.93951E-08 | 0.000728241 | 0.173569 |
| ENSSSCT00000007365 -                   | 34.0376  | 0.44948 | 0.20556 | 1.68312E-07 | 3.10525E-08 | 0.512963 |
| ENSSSCT00000007366 <i>TBX15</i>        | 28.5737  | 0.27935 | 0.12796 | 1.92701E-08 | 4.1306E-09  | 0.51387  |
| ENSSSCT00000007380 <i>IGSF3</i>        | 1.41157  | 6.49788 | 7.0319  | 6.42231E-05 | 0.000120498 | 0.769762 |
| ENSSSCT00000007570 <i>HFM1</i>         | 1.74185  | 0.09081 | 0.1235  | 0.000408127 | 0.000452501 | 0.769262 |
| ENSSSCT00000007604 <i>CYR61</i>        | 48.8274  | 109.424 | 170.969 | 0.00032815  | 1.59826E-05 | 0.029043 |
| ENSSSCT00000007644 <i>MSR1</i>         | 39.5029  | 6.65058 | 4.34882 | 5.90505E-09 | 6.61158E-09 | 0.252608 |
| ENSSSCT00000007702 <i>AP3M2</i>        | 0.63404  | 11.0278 | 7.07188 | 1.43518E-05 | 0.000276836 | 0.193464 |
| ENSSSCT00000007971 <i>ACSS2</i>        | 47.6799  | 138.583 | 129.889 | 1.44564E-06 | 0.000491051 | 0.752088 |
| ENSSSCT00000007976 -                   | 5.67634  | 21.654  | 18.4108 | 5.17439E-06 | 0.000785125 | 0.487566 |
| ENSSSCT00000008027 <i>NNAT</i>         | 245.825  | 780.522 | 770.279 | 2.86739E-07 | 9.05094E-05 | 0.950503 |
| ENSSSCT00000008028 -                   | 107.671  | 818.008 | 723.127 | 0           | 1.20288E-10 | 0.560088 |
| ENSSSCT00000008036 <i>LOC100516472</i> | 0.217402 | 3.2741  | 4.0835  | 4.17253E-05 | 6.50937E-06 | 0.489306 |
| ENSSSCT00000008196 <i>PFDN4</i>        | 11.7458  | 2.32794 | 3.06121 | 0.000256382 | 0.00263023  | 0.590673 |
| ENSSSCT00000008423 <i>SH2B2</i>        | 0.318221 | 5.04717 | 4.16062 | 0.00143642  | 0.00278426  | 0.689987 |
| ENSSSCT00000008604 <i>LOC100525983</i> | 8.97907  | 32.7391 | 42.188  | 0.000216785 | 6.45424E-05 | 0.324788 |
| ENSSSCT00000008741 <i>LOC100737768</i> | 546.023  | 1285.98 | 2366.52 | 0.000113746 | 5.06215E-07 | 0.004266 |
| ENSSSCT00000008766 <i>RHBDL1</i>       | 14.7171  | 37.7667 | 49.8989 | 0.00143044  | 0.000398522 | 0.241173 |
| ENSSSCT00000008781 <i>IGFALS</i>       | 3.51559  | 11.5113 | 12.7409 | 0.000908274 | 0.00118089  | 0.708467 |
| ENSSSCT00000008919 <i>C3H2orf40</i>    | 3.64648  | 20.3681 | 38.5978 | 0.000438091 | 1.78212E-06 | 0.032424 |
| ENSSSCT00000008984 <i>LOC100736878</i> | 9.53598  | 59.0709 | 94.905  | 2.69171E-08 | 4.28656E-10 | 0.035293 |
| ENSSSCT00000009149 <i>MEIS2</i>        | 22.2844  | 112.943 | 160.457 | 4.38707E-07 | 5.74398E-08 | 0.126511 |
| ENSSSCT00000009150 -                   | 5.76031  | 43.4375 | 39.0056 | 9.65827E-09 | 1.30149E-06 | 0.652178 |
| ENSSSCT00000009162 <i>UGP2</i>         | 97.0471  | 44.6137 | 24.4248 | 0.000592889 | 4.81929E-06 | 0.007975 |
| ENSSSCT00000009417 -                   | 8.5567   | 29.7083 | 39.1371 | 0.00182186  | 0.000366729 | 0.340984 |
| ENSSSCT00000009500 <i>NAT8L</i>        | 4.85501  | 38.4142 | 46.0529 | 4.48219E-06 | 1.97411E-06 | 0.505053 |
| ENSSSCT00000009594 <i>LOC100520753</i> | 7.71301  | 0.58469 | 0.17018 | 0.000106053 | 1.35864E-05 | 0.23171  |
| ENSSSCT00000009793 <i>LOC100516986</i> | 67.9734  | 33.4675 | 24.8929 | 0.00243476  | 0.000959664 | 0.202385 |
| ENSSSCT00000009841 <i>SHROOM3</i>      | 0.78295  | 3.79368 | 5.10882 | 0.000149779 | 2.13587E-05 | 0.286158 |
| ENSSSCT00000009861 <i>SFRP2</i>        | 5.92851  | 133.983 | 114.496 | 0           | 1.5099E-14  | 0.453349 |
| ENSSSCT00000009862 -                   | 6.31815  | 135.003 | 102.227 | 0           | 7.06102E-14 | 0.182507 |
| ENSSSCT00000009960 <i>CCNA2</i>        | 5.1695   | 0.25681 | 0.52318 | 0.000318629 | 0.000945969 | 0.475172 |
| ENSSSCT00000009978 <i>SYNPO2</i>       | 33.0735  | 101.964 | 127.776 | 3.85372E-07 | 2.89203E-06 | 0.273725 |
| ENSSSCT00000009981 <i>PRSS12</i>       | 4.31358  | 27.2208 | 24.3316 | 9.11077E-10 | 9.84564E-07 | 0.613953 |
| ENSSSCT00000010077 <i>SNCA</i>         | 9.31987  | 40.3937 | 41.4277 | 0.00165951  | 0.00230028  | 0.938894 |
| ENSSSCT00000010092 -                   | 28.0387  | 2.24242 | 4.60697 | 2.18851E-07 | 3.21515E-05 | 0.197848 |
| ENSSSCT00000010125 <i>SCD5</i>         | 1.24834  | 9.33912 | 8.17888 | 3.68782E-06 | 5.57485E-05 | 0.633644 |
| ENSSSCT00000010225 <i>LOC100153765</i> | 100.645  | 32.6353 | 28.652  | 2.82745E-06 | 4.37284E-05 | 0.59111  |
| ENSSSCT00000010326 <i>LOC100739376</i> | 6.87714  | 57.9149 | 33.1059 | 2.14963E-08 | 0.000202744 | 0.028566 |
| ENSSSCT00000010505 <i>SEMA4D</i>       | 0.630541 | 3.90734 | 6.59274 | 0.00033542  | 4.5967E-06  | 0.086017 |
| ENSSSCT00000010634 <i>HPGD</i>         | 1.25537  | 18.6768 | 17.0185 | 8.52585E-07 | 2.97809E-06 | 0.742517 |
| ENSSSCT00000010731 <i>GPR81</i>        | 107.544  | 49.8065 | 37.0981 | 0.00140129  | 0.000637653 | 0.22572  |
| ENSSSCT00000010771 -                   | 20.665   | 97.7254 | 62.1899 | 6.87564E-08 | 0.00163573  | 0.04986  |
| ENSSSCT00000010999 -                   | 1.03588  | 11.5768 | 18.5603 | 0.0022916   | 8.25196E-05 | 0.172385 |
| ENSSSCT00000011108 -                   | 24.7991  | 2.76033 | 3.58786 | 5.14072E-07 | 1.44584E-05 | 0.6117   |
| ENSSSCT00000011118 <i>TBCE</i>         | 41.5018  | 1.88138 | 4.6918  | 0.000796943 | 0.002826    | 0.391554 |
| ENSSSCT00000011329 <i>LOC100512562</i> | 1.98957  | 7.80193 | 8.54357 | 0.000394513 | 0.000525918 | 0.745818 |
| ENSSSCT00000011466 <i>O3FAR1</i>       | 20.5914  | 55.8982 | 66.6156 | 0.000283371 | 0.000385146 | 0.437866 |
| ENSSSCT00000011467 <i>RBP4</i>         | 153.456  | 373.606 | 376.79  | 5.46354E-05 | 0.00174736  | 0.966981 |
| ENSSSCT00000011523 <i>LOC100155158</i> | 2.7575   | 8.88334 | 9.38055 | 0.00135837  | 0.00247332  | 0.845177 |
| ENSSSCT00000011546 <i>SCD</i>          | 393.26   | 79.9783 | 103.35  | 1.56308E-11 | 8.22468E-06 | 0.214421 |
| ENSSSCT00000011662 <i>HSPA12A</i>      | 25.8698  | 68.294  | 84.6942 | 5.11501E-05 | 8.72566E-05 | 0.302319 |

|                    |              |          |         |         |             |             |          |
|--------------------|--------------|----------|---------|---------|-------------|-------------|----------|
| ENSSSCT00000011714 | ZFP36        | 91.5209  | 248.35  | 375.47  | 9.78925E-06 | 1.29585E-06 | 0.043091 |
| ENSSSCT00000011848 | LOC100517234 | 8.75014  | 59.8772 | 81.8087 | 2.99955E-07 | 4.21443E-08 | 0.199329 |
| ENSSSCT00000012011 | LOC10052451E | 7.39319  | 24.1512 | 25.6468 | 0.000360856 | 0.000970091 | 0.814703 |
| ENSSSCT00000012032 | AQP3         | 2286.68  | 617.971 | 593.643 | 3.09743E-07 | 1.63623E-05 | 0.852077 |
| ENSSSCT00000012056 | BAMBI        | 5.73567  | 16.4201 | 21.9992 | 0.00238229  | 0.000453221 | 0.268955 |
| ENSSSCT00000012082 | SSC.9229     | 35.0697  | 12.8273 | 8.08263 | 9.84114E-05 | 1.42759E-05 | 0.096663 |
| ENSSSCT00000012249 | COL6A5       | 0.959938 | 23.9053 | 13.3499 | 0           | 8.16902E-13 | 0.005172 |
| ENSSSCT00000012332 | CSRNP1       | 10.7311  | 32.0048 | 42.391  | 6.11155E-05 | 2.75029E-05 | 0.204061 |
| ENSSSCT00000012345 | -            | 1.35036  | 15.4032 | 14.0972 | 0.000479323 | 0.000535509 | 0.786137 |
| ENSSSCT00000012432 | COL7A1       | 0.247985 | 1.61228 | 2.01505 | 9.58246E-05 | 2.40794E-05 | 0.453306 |
| ENSSSCT00000012697 | SLC6A6       | 18.5476  | 3.9863  | 5.40134 | 2.99205E-05 | 0.00154068  | 0.453196 |
| ENSSSCT00000012807 | -            | 2.7483   | 14.6729 | 12.9271 | 1.39503E-06 | 9.42821E-05 | 0.604216 |
| ENSSSCT00000012990 | DTX3L        | 0.356931 | 5.73486 | 3.22688 | 1.85291E-05 | 0.000803712 | 0.101905 |
| ENSSSCT00000013068 | CD47         | 30.8948  | 10.6468 | 5.99282 | 0.00078725  | 4.60741E-05 | 0.133509 |
| ENSSSCT00000013158 | ADAMTS1      | 22.9845  | 120.608 | 215.977 | 7.85372E-13 | 5.61773E-14 | 0.004641 |
| ENSSSCT00000013277 | ACE2         | 31.3632  | 178.947 | 93.982  | 1.59872E-14 | 0.000161728 | 0.001717 |
| ENSSSCT00000013473 | KDM5C        | 4.97272  | 12.434  | 13.8198 | 0.000835532 | 0.00221337  | 0.641515 |
| ENSSSCT00000013944 | GABRE        | 29.291   | 9.15022 | 7.60472 | 0.000114939 | 0.000201972 | 0.577981 |
| ENSSSCT00000014289 | FADS2        | 16.7341  | 40.906  | 63.8313 | 0.0013893   | 5.13889E-05 | 0.050191 |
| ENSSSCT00000014597 | LDHA         | 176.965  | 85.6018 | 53.7094 | 0.00104323  | 4.80873E-05 | 0.028641 |
| ENSSSCT00000014614 | NUCB2        | 11.4172  | 3.31033 | 2.13052 | 0.00121452  | 0.000243355 | 0.354901 |
| ENSSSCT00000014641 | DKK3         | 4.11561  | 18.6653 | 16.2039 | 3.05887E-06 | 0.000219988 | 0.559788 |
| ENSSSCT00000014792 | -            | 18.8578  | 0.7811  | 0.54273 | 1.40185E-05 | 5.85176E-06 | 0.724542 |
| ENSSSCT00000014800 | -            | 18.2731  | 141.855 | 134.329 | 0           | 1.62779E-11 | 0.797034 |
| ENSSSCT00000015009 | JUNB         | 35.4822  | 77.6914 | 125.291 | 0.00194994  | 4.81813E-05 | 0.026377 |
| ENSSSCT00000015061 | DNAJB1       | 87.0765  | 232.487 | 256.824 | 8.88787E-06 | 0.000170335 | 0.62759  |
| ENSSSCT00000015138 | C19ORF44     | 0.738658 | 5.17631 | 6.24356 | 0.00127316  | 0.000372917 | 0.603829 |
| ENSSSCT00000015164 | -            | 1.32679  | 8.52902 | 6.14627 | 1.38117E-05 | 0.00110885  | 0.247728 |
| ENSSSCT00000015440 | VCAN         | 15.0232  | 1.96449 | 3.11276 | 7.99361E-15 | 3.35069E-07 | 0.081156 |
| ENSSSCT00000015542 | SEMA6A       | 5.30858  | 16.7749 | 21.3666 | 5.37938E-05 | 3.69788E-05 | 0.285961 |
| ENSSSCT00000015640 | -            | 43.5462  | 12.5097 | 8.71442 | 2.20024E-05 | 1.06033E-05 | 0.275583 |
| ENSSSCT00000015641 | -            | 349.085  | 127.677 | 127.788 | 6.70995E-06 | 0.000522934 | 0.996629 |
| ENSSSCT00000015654 | LOC10051536E | 8.31818  | 21.0327 | 24.7322 | 0.00237111  | 0.00209972  | 0.510941 |
| ENSSSCT00000015660 | EGR1         | 19.7219  | 190.745 | 296.842 | 0           | 0           | 0.030495 |
| ENSSSCT00000015663 | EGR1         | 27.9806  | 226.298 | 373.95  | 0           | 0           | 0.014917 |
| ENSSSCT00000015920 | LOC10051978E | 66.6163  | 18.422  | 22.6165 | 4.39003E-05 | 0.0023905   | 0.53745  |
| ENSSSCT00000016076 | HBB          | 993.5    | 2531.68 | 3804.58 | 9.07969E-05 | 1.18005E-05 | 0.082491 |
| ENSSSCT00000016185 | UCP2         | 39.342   | 108.581 | 115.324 | 1.06551E-05 | 0.000273189 | 0.769406 |
| ENSSSCT00000016216 | -            | 429.96   | 1200.18 | 1347.22 | 2.14895E-05 | 0.000174216 | 0.620993 |
| ENSSSCT00000016240 | THRSP        | 1004.56  | 2237.15 | 2481.07 | 0.000324763 | 0.00176939  | 0.623574 |
| ENSSSCT00000016242 | THRSP        | 1006.37  | 2240.46 | 2498.19 | 0.000326852 | 0.00166929  | 0.605671 |
| ENSSSCT00000016331 | -            | 1.45849  | 6.856   | 13.5369 | 0.000797088 | 1.52924E-06 | 0.017608 |
| ENSSSCT00000016375 | DDX10        | 16.3159  | 2.34918 | 2.9275  | 0.00112178  | 0.00247421  | 0.760751 |
| ENSSSCT00000016638 | -            | 63.5293  | 224.217 | 386.859 | 1.79289E-07 | 2.63391E-09 | 0.008083 |
| ENSSSCT00000016779 | LOC10062450E | 74.2575  | 24.117  | 25.8378 | 8.53656E-06 | 0.000740108 | 0.785725 |
| ENSSSCT00000016952 | -            | 2.15924  | 13.7189 | 12.8471 | 0.000762209 | 0.00148831  | 0.852802 |
| ENSSSCT00000016964 | -            | 1.79517  | 7.7843  | 9.56226 | 0.000184051 | 0.000115188 | 0.447544 |
| ENSSSCT00000016988 | LOC100738612 | 14.8788  | 84.8961 | 76.2393 | 6.15583E-09 | 3.62088E-06 | 0.631815 |
| ENSSSCT00000017115 | LOC100516112 | 13.197   | 1.30248 | 0.99316 | 0.00034169  | 0.000154595 | 0.755383 |
| ENSSSCT00000017164 | -            | 0.081332 | 7.44185 | 2.9931  | 0.00001686  | 0.000977617 | 0.09156  |
| ENSSSCT00000017182 | LOC10062395E | 0.754794 | 9.16516 | 9.39395 | 0.000520248 | 0.00035501  | 0.948735 |
| ENSSSCT00000017282 | NR4A2        | 2.92001  | 10.7224 | 21.8086 | 0.00151934  | 2.41676E-06 | 0.011149 |
| ENSSSCT00000017314 | GRB14        | 0.343396 | 11.4812 | 5.42962 | 8.29991E-07 | 0.000106332 | 0.022458 |
| ENSSSCT00000017404 | LOC100515172 | 38.26    | 0.96291 | 6.93062 | 2.33869E-08 | 3.24077E-05 | 0.004667 |
| ENSSSCT00000017523 | CLK1         | 11.8195  | 44.3788 | 47.9688 | 1.62603E-06 | 3.00821E-05 | 0.723048 |
| ENSSSCT00000017744 | NGEF         | 7.62675  | 0.8133  | 0.55162 | 0.00163144  | 0.000504756 | 0.686507 |
| ENSSSCT00000017761 | LOC10015260E | 10.1199  | 1.72542 | 1.40036 | 6.03756E-05 | 5.74281E-05 | 0.709419 |
| ENSSSCT00000018091 | LOC100511484 | 2.48969  | 12.4819 | 11.226  | 0.000508527 | 0.00218171  | 0.742404 |
| ENSSSCT00000018099 | LOC10051750E | 0.773013 | 4.70871 | 3.5947  | 7.23588E-06 | 0.000520405 | 0.333077 |
| ENSSSCT00000018104 | LOC10051683E | 17.7027  | 1.07656 | 2.55662 | 4.70731E-06 | 9.58211E-05 | 0.218429 |

|                                        |         |         |         |             |             |          |
|----------------------------------------|---------|---------|---------|-------------|-------------|----------|
| ENSSSCT00000018432 <i>PLK2</i>         | 10.7082 | 44.2885 | 50.2165 | 1.62603E-08 | 7.53114E-07 | 0.547166 |
| ENSSSCT00000018501 <i>DUSP1</i>        | 106.004 | 719.276 | 1135.05 | 0           | 1.77636E-15 | 0.0422   |
| ENSSSCT00000018610 -                   | 1587.14 | 756.654 | 533.844 | 0.00204386  | 0.000278879 | 0.09961  |
| ENSSSCT00000018664 <i>LOC100525071</i> | 82.4734 | 2.98864 | 4.08579 | 0           | 4.44089E-15 | 0.478131 |
| ENSSSCT00000018968 <i>FKBP10</i>       | 25.0298 | 8.07692 | 6.30367 | 0.00226136  | 0.00124833  | 0.574193 |
| ENSSSCT00000019031 -                   | 65.5583 | 142.244 | 171.34  | 0.00053101  | 0.00101331  | 0.364768 |
| ENSSSCT00000019294 <i>LOC100520269</i> | 9.81031 | 48.1672 | 47.2999 | 1.94422E-07 | 1.04085E-05 | 0.936947 |

**Table S3. The primers information of macrophages and inflammation related genes.**

| Target genes | Sequences of primers (5'→3')                            | Products length | GeneBank accession No. |
|--------------|---------------------------------------------------------|-----------------|------------------------|
| <i>CD14</i>  | F:CAGGCAGGCAACATCCCTCATT<br>R:GTCCTCACTCTTTGGCAGACTTTGG | 160             | NM_001097445.2         |
| <i>MCP-1</i> | F:CAGCAGCAAGTGTCTAAAGAAG<br>R:AGGGCAAGTTAGAAGGAAATGAA   | 194             | NM_214214.1            |
| <i>TNF-α</i> | F:CCCCAGAAGGAAGAGTTTC<br>R:CGGGCTTATCTGAGGTTTGA         | 92              | NM_214022.1            |
| <i>IL-10</i> | F:TGAAGAGTGCCTTTAGCAAGCTC<br>R:CTCATCTTCATCGTCATGTAGGC  | 106             | NM_214041.1            |
| <i>IL-6</i>  | F:CACCGGTCTTGTGGAGTTTC<br>R:GTGGTGGCTTTGTCTGGATT        | 150             | NM_214399.1            |
| <i>IL-8</i>  | F:GGCAGTTTTCTGCTTTCT<br>R:CAGTGGGGTCCACTCTCAAT          | 153             | NM_213867.1            |
| <i>IL-1B</i> | F: AAAGGGGACTTGAAGAGAG<br>R: CTGCTTGAGAGGTGCTGATGT      | 286             | NM_214055              |
| <i>ACTB</i>  | F:TCTGGCACCACACCTTCT<br>R:TGATCTGGGTCATCTTCTCAC         | 114             | DQ178122               |
| <i>TBP</i>   | F:GATGGACGTTTCGGTTTAGG<br>R:AGCAGCACAGTACGAGCAA         | 124             | DQ178129               |
| <i>TOP2B</i> | F:AACTGGATGATGCTAATGATGCT<br>R:TGGAAAACTCCGTATCTGTCTC   | 137             | AF222921               |

Note: *β-actin (ACTB)*, *TATA box binding protein (TBP)*, and *topoisomerase IIβ (TOP2B)* were used as endogenous control genes.

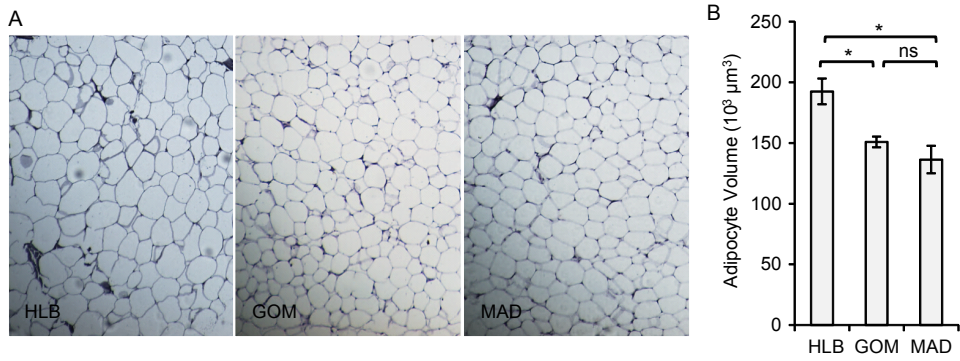

**Figure S1. Phenotype analysis of three adipose tissues.** (A) Representative pictures of the enlarged adipocytes (20x). (B) Adipocyte volume of VATs and SAT. One-Way ANOVA, Tukey multiple range test, Mean  $\pm$  SD. \* indicate  $P < 0.05$ ; ns: not significant.

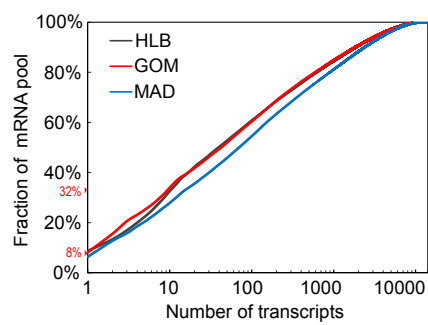

**Figure S2. Complexity of transcriptomes of three adipose tissues.**



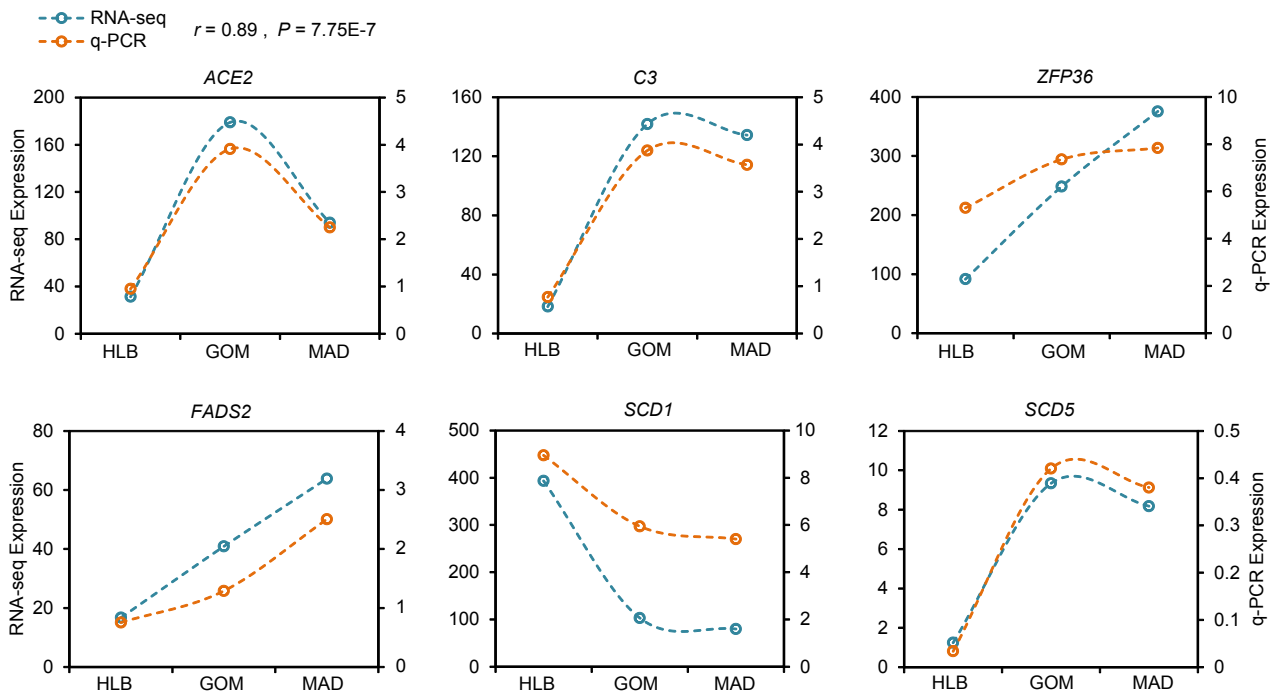

**Figure S3 Validation of gene expression by Q-PCR.** The data presented in Y-axis indicated the mRNA expression of Q-PCR and RNA-seq. The Pearson correlation coefficient ( $r$ ) and the  $P$ -value were shown for the six genes.
